# Supplementary material for: Validation of a machine learning approach to estimate Clinical Disease Activity Index Scores for rheumatoid arthritis
Source: HighWire-hosted journal article supplement (doi:10.1136/rmdopen-2021-001781), 2021-11-01

**Supplemental Figure 1. Bland-Altman plots demonstrating agreement between the CDAI and the eCDAI**

S1A.

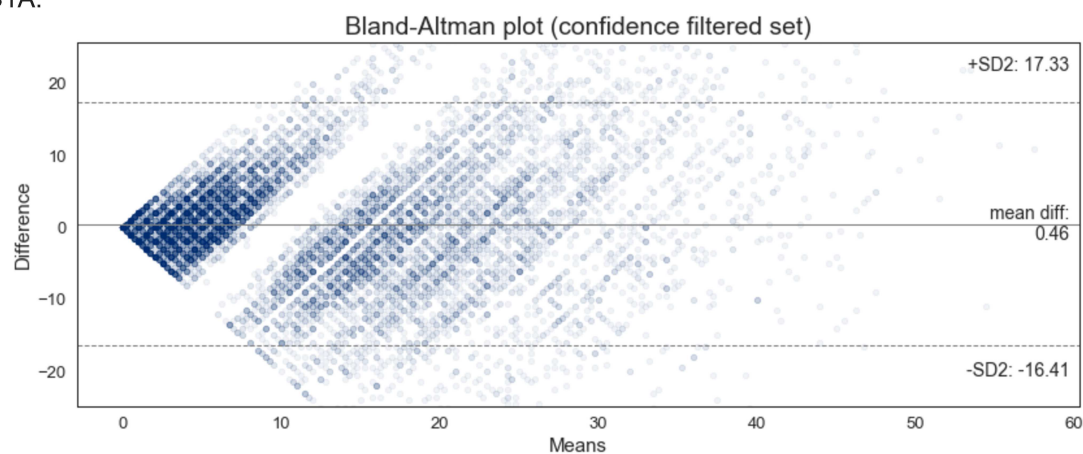

S1B.

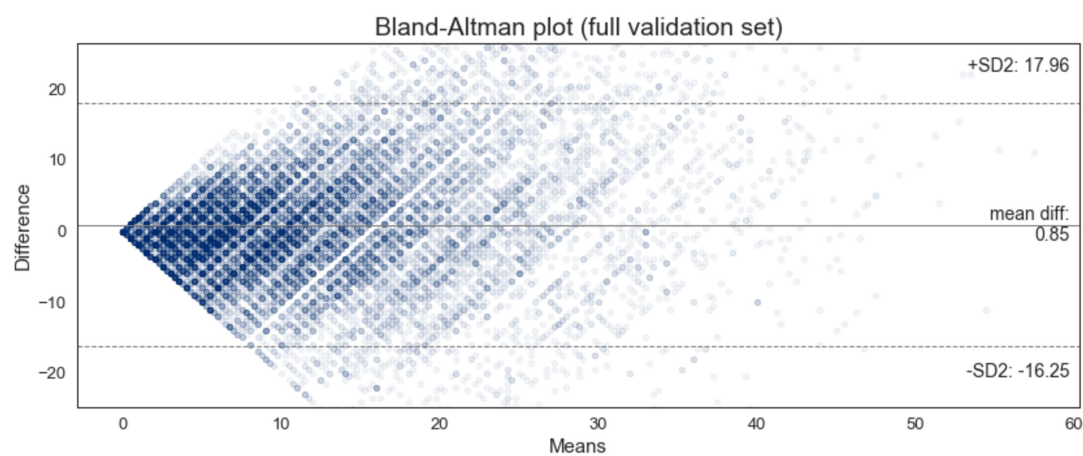

Supplement: rmdopen-2021-001781supp001_data_supplement.pdf [file rmdopen-2021-001781supp001_data_supplement.pdf]
